# Supplementary material for: Hair mercury isotopes, a noninvasive biomarker for dietary methylmercury exposure and biological uptake
Source: Royal Society of Chemistry journal article supplement (doi:10.1039/d4em00231h), 2024-01-01
Supplement: d4em00231h1.pdf [file d4em00231h1.pdf]

| sample_number | id_new | hair_thg<br>$\mu\text{g/g}$ | hair_mdf202<br>‰ | hair_mif199<br>‰ | hair_mif201<br>‰ |
|---------------|--------|-----------------------------|------------------|------------------|------------------|
| 1             | 10096  | 0.656351                    | 0.497582         | 0.276023         | 0.215939         |
| 2             | 10127  | 0.465826                    | 0.502046         | -0.005479        | -0.022233        |
| 3             | 10151  | 0.327127                    | 0.432904         | 0.228334         | 0.157717         |
| 4             | 10244  | 0.436223                    | -0.005138        | 0.012129         | 0.095467         |
| 5             | 10321  | 0.374835                    | 0.569546         | 0.163163         | 0.09509          |
| 6             | 10351  | 0.352922                    | 0.611636         | 0.436571         | 0.296999         |
| 7             | 10378  | 0.508994                    | -0.109526        | -0.008132        | -0.050627        |
| 8             | 10428  | 0.666845                    | 0.300746         | 0.43701          | 0.34189          |
| 9             | 10449  | 0.339409                    | 1.02947          | 0.003347         | 0.038791         |
| 10            | 10507  | 0.660593                    | 0.393018         | 0.102306         | 0.054681         |
| 11            | 10670  | 0.453469                    | 0.524329         | 0.155178         | 0.117815         |
| 12            | 10712  | 0.651067                    | -0.089972        | 0.203936         | 0.147248         |
| 13            | 10731  | 0.542922                    | 0.063492         | 0.428217         | 0.289936         |
| 14            | 10737  | 0.822076                    | -0.165383        | -0.035412        | -0.021666        |
| 15            | 10828  | 0.274686                    | 1.49906          | 0.414352         | 0.367213         |
| 16            | 10862  | 0.19166                     | 1.39388          | 0.173076         | 0.019599         |
| 17            | 10866  | 0.569123                    | 0.719213         | 0.30079          | 0.239045         |
| 18            | 10887  | 0.47312                     | 0.063268         | 0.230553         | 0.150165         |
| 19            | 10907  | 0.442241                    | 0.048484         | 0.184515         | 0.105547         |
| 20            | 10977  | 0.434858                    | 0.052894         | 0.104712         | 0.141087         |
| 21            | 11008  | 1.03979                     | -0.694283        | 0.099768         | 0.04769          |
| 22            | 11009  | 0.451795                    | 1.23665          | 0.338582         | 0.224718         |
| 23            | 11083  | 0.530143                    | -0.326116        | 0.049777         | 0.062714         |
| 24            | 11119  | 0.621749                    | 0.50079          | 0.152793         | 0.069857         |
| 25            | 11147  | 0.677781                    | 1.03992          | -0.019406        | -0.062046        |
| 26            | 11160  | 0.740102                    | 0.441197         | 0.403786         | 0.271775         |
| 27            | 11180  | 0.613175                    | -0.273164        | 0.302887         | 0.224086         |
| 28            | 11195  | 0.848369                    | -0.110384        | 0.14251          | 0.038814         |
| 29            | 11319  | 0.234234                    | 0.886234         | 0.38288          | 0.346948         |
| 30            | 11358  | 0.785225                    | 0.512525         | 0.053832         | 0.021188         |
| 31            | 11378  | 0.411528                    | -0.049879        | 0.18698          | 0.12261          |
| 32            | 11399  | 0.169925                    | 0.490951         | 0.224511         | 0.16146          |
| 33            | 11432  | 0.487847                    | -0.244773        | 0.117079         | 0.086055         |
| 34            | 11467  | 0.453059                    | -0.337635        | 0.026119         | -0.053564        |
| 35            | 11487  | 0.29873                     | 0.919692         | 0.218893         | 0.121463         |
| 36            | 11507  | 1.33791                     | -0.123758        | 0.185903         | 0.081291         |
| 37            | 11526  | 0.475038                    | 0.967745         | 0.148515         | 0.129679         |
| 38            | 11570  | 0.249666                    | 1.28974          | 0.291992         | 0.225365         |
| 39            | 11592  | 0.6003                      | -0.258723        | -0.064482        | -0.127803        |
| 40            | 11635  | 0.659267                    | 0.748348         | 0.525259         | 0.459276         |
| 41            | 11642  | 0.823002                    | -0.124566        | -0.028815        | 0.026639         |
| 42            | 11643  | 0.802915                    | -0.149718        | 0.023219         | 0.066826         |
| 43            | 11678  | 0.531516                    | -0.124978        | 0.204665         | 0.169207         |

|    |       |          |           |           |           |
|----|-------|----------|-----------|-----------|-----------|
| 44 | 11691 | 0.523445 | 0.436837  | 0.076023  | 0.048585  |
| 45 | 11711 | 0.545852 | 0.691754  | -0.046295 | -0.069856 |
| 46 | 11736 | 0.478247 | 1.52649   | 0.605372  | 0.415703  |
| 47 | 11743 | 0.518097 | -0.640409 | 0.190827  | 0.132651  |
| 48 | 11775 | 0.192943 | 1.39165   | 0.437451  | 0.315988  |
| 49 | 11796 | 0.716289 | -0.512817 | 0.050538  | 0.013457  |
| 50 | 11809 | 0.434667 | 1.06872   | 0.188696  | 0.133355  |
| 51 | 12057 | 0.691255 | -0.353162 | 0.109111  | 0.06482   |
| 52 | 12098 | 0.420966 | 0.094424  | 0.342065  | 0.262663  |
| 53 | 12109 | 0.799959 | -0.342416 | 0.090505  | 0.032717  |
| 54 | 12141 | 0.435213 | -0.004901 | -0.016421 | 0.111761  |
| 55 | 12168 | 0.481952 | 0.385284  | 0.13238   | 0.046864  |
| 56 | 12205 | 0.558175 | -0.065887 | 0.066479  | 0.036992  |
| 57 | 12270 | 0.373951 | -0.178374 | 0.113831  | 0.014211  |
| 58 | 12316 | 0.669186 | -0.463571 | 0.169348  | 0.119752  |
| 59 | 12392 | 0.898787 | -0.481029 | 0.016136  | -0.004604 |
| 60 | 12394 | 0.397172 | -0.073308 | 0.289273  | 0.187883  |
| 61 | 12395 | 0.688727 | 0.063345  | 0.039838  | -0.026528 |
| 62 | 12401 | 1.76252  | 0.229151  | 0.147933  | 0.035906  |
| 63 | 12417 | 1.10852  | -0.22922  | 0.104877  | 0.033124  |
| 64 | 12427 | 0.811002 | -0.276547 | 0.076286  | 0.080485  |
| 65 | 12490 | 0.40836  | 0.009119  | 0.081665  | 0.021356  |
| 66 | 12519 | 0.388709 | 0.764341  | 0.060136  | 0.082919  |
| 67 | 12525 | 0.242252 | -0.069721 | 0.00168   | -0.058344 |
| 68 | 12600 | 0.286875 | 0.759512  | 0.27913   | 0.302406  |
| 69 | 12719 | 0.489082 | -0.093713 | 0.387671  | 0.264043  |
| 70 | 12735 | 0.483868 | -0.107438 | 0.274971  | 0.204141  |
| 71 | 12825 | 0.492182 | 0.077383  | 0.247379  | 0.258556  |
| 72 | 12842 | 1.0319   | -0.089652 | 0.114192  | 0.049743  |
| 73 | 12864 | 0.359718 | 0.862282  | 0.226298  | 0.162309  |
| 74 | 12899 | 0.286549 | 1.11615   | -0.013462 | -0.070812 |
| 75 | 12912 | 0.18208  | 0.526084  | 0.121205  | 0.075776  |
| 76 | 12923 | 0.458781 | 1.77732   | 0.139449  | 0.095606  |
| 77 | 12924 | 0.427499 | 0.531698  | 0.130203  | 0.048858  |
| 78 | 13003 | 0.37392  | 0.727953  | 0.094605  | 0.101679  |
| 79 | 13049 | 0.488554 | 0.445177  | 0.043096  | 0.026771  |
| 80 | 13055 | 0.82164  | -0.484713 | 0.402782  | 0.211193  |
| 81 | 13106 | 0.650554 | 1.7981    | 0.546053  | 0.474741  |
| 82 | 13112 | 0.55332  | -0.042833 | 0.083936  | 0.109161  |
| 83 | 13178 | 0.371637 | 0.775379  | 0.055012  | 0.012962  |
| 84 | 13179 | 0.201812 | 0.464599  | 0.14115   | 0.111381  |
| 85 | 13187 | 0.608393 | -0.160613 | 0.175384  | 0.14118   |
| 86 | 13227 | 0.337421 | -0.302854 | -0.048872 | -0.05867  |
| 87 | 13241 | 0.955156 | 0.593157  | 0.178263  | 0.114114  |
| 88 | 13245 | 0.314359 | 0.926343  | 0.060787  | 0.015421  |

|     |       |          |           |           |           |
|-----|-------|----------|-----------|-----------|-----------|
| 89  | 13328 | 0.251664 | 0.381738  | 0.096397  | 0.033914  |
| 90  | 13330 | 0.415595 | 0.235361  | 0.411345  | 0.311814  |
| 91  | 13422 | 0.297515 | 0.992747  | 0.1108    | 0.063133  |
| 92  | 13425 | 0.461299 | 0.111832  | 0.145258  | 0.095846  |
| 93  | 13449 | 0.410839 | 0.987997  | 0.308022  | 0.189792  |
| 94  | 13475 | 0.725143 | 1.1672    | 0.247106  | 0.156829  |
| 95  | 13530 | 0.275167 | 0.799283  | 0.161605  | 0.084465  |
| 96  | 13543 | 1.27753  | -0.19781  | 0.100071  | 0.019077  |
| 97  | 13545 | 0.279555 | 0.399262  | 0.247719  | 0.155389  |
| 98  | 13590 | 0.628544 | 0.525146  | 0.043488  | -0.036894 |
| 99  | 13645 | 0.406342 | 1.05143   | -0.074975 | -0.071068 |
| 100 | 13652 | 0.395413 | 0.714076  | 0.026747  | -0.020042 |
| 101 | 13662 | 0.781153 | 1.11599   | 0.373333  | 0.302799  |
| 102 | 13731 | 0.714471 | -0.031518 | 0.086143  | 0.053939  |
| 103 | 13782 | 0.427191 | -0.043121 | 0.27024   | 0.122248  |
| 104 | 13792 | 0.501514 | -0.117116 | 0.148764  | 0.013688  |
| 105 | 13793 | 0.779881 | 0.288623  | 0.045353  | -0.013399 |
| 106 | 13854 | 0.387987 | 0.225002  | 0.035502  | 0.024136  |
| 107 | 13870 | 0.466159 | 1.44185   | 0.036265  | 0.017247  |
| 108 | 13884 | 0.3213   | 0.763577  | 0.204667  | 0.064184  |
| 109 | 14050 | 0.42072  | 0.580758  | -0.09364  | -0.072997 |
| 110 | 14056 | 0.831303 | 0.569681  | -0.001911 | -0.101611 |
| 111 | 14072 | 0.772447 | -0.665839 | 0.060969  | 0.027093  |
| 112 | 14073 | 1.0379   | -0.861948 | -0.077608 | -0.113053 |
| 113 | 14102 | 0.751801 | 0.653846  | 0.459198  | 0.337049  |
| 114 | 14147 | 0.638937 | 0.758491  | 0.064257  | 0.104061  |
| 115 | 14161 | 0.509281 | 0.335958  | 0.009203  | -0.00961  |
| 116 | 14183 | 1.19632  | -0.116241 | 0.11301   | 0.041698  |
| 117 | 14214 | 0.32935  | 0.582039  | -0.018933 | 0.002197  |
| 118 | 14234 | 0.263235 | 0.818778  | 0.083276  | 0.056616  |
| 119 | 14256 | 0.331936 | 1.03247   | 0.276324  | 0.258323  |
| 120 | 14280 | 0.897717 | -0.893046 | -0.074007 | -0.100762 |
| 121 | 14281 | 0.520642 | -0.013353 | 0.112418  | 0.037765  |
| 122 | 14343 | 0.27008  | -0.131987 | 0.250809  | 0.201157  |
| 123 | 14362 | 0.612612 | 1.05861   | 0.282984  | 0.184198  |
| 124 | 14366 | 0.533859 | -0.464982 | 0.107196  | 0.048097  |
| 125 | 14396 | 0.45745  | -0.055207 | 0.183036  | 0.120654  |
| 126 | 14399 | 0.615106 | 0.129781  | 0.086195  | 0.021194  |
| 127 | 14407 | 0.43843  | -0.246183 | 0.246134  | 0.207933  |
| 128 | 14424 | 0.426833 | -0.195297 | 0.067088  | 0.011714  |
| 129 | 14445 | 0.421215 | 0.801686  | 0.180592  | 0.186102  |
| 130 | 14492 | 0.197296 | 0.678413  | 0.161097  | 0.113405  |
| 131 | 14511 | 0.493193 | -0.312902 | 0.067983  | 0.051032  |
| 132 | 14512 | 0.334738 | 0.186876  | 0.187509  | 0.132128  |
| 133 | 14517 | 0.255831 | 0.885678  | 0.120398  | 0.059313  |

|     |       |          |           |           |           |
|-----|-------|----------|-----------|-----------|-----------|
| 134 | 14519 | 0.903777 | -0.685703 | 0.023061  | 0.061173  |
| 135 | 14560 | 0.295931 | 1.20022   | 0.256995  | 0.18174   |
| 136 | 14616 | 0.444927 | 0.517444  | 0.102856  | 0.055566  |
| 137 | 14642 | 0.248486 | 0.363174  | 0.219104  | 0.292811  |
| 138 | 14675 | 0.400868 | 1.25437   | 0.273536  | 0.201378  |
| 139 | 14681 | 0.867038 | 0.592772  | 0.117164  | 0.046992  |
| 140 | 14689 | 0.284626 | -0.105743 | 0.152939  | 0.12178   |
| 141 | 14705 | 0.726213 | 0.123944  | 0.05981   | -0.041012 |
| 142 | 14774 | 0.47478  | 0.357259  | 0.221291  | 0.069817  |
| 143 | 14965 | 0.431566 | 0.650199  | 0.02638   | 0.008553  |
| 144 | 14972 | 0.768572 | 0.000375  | 0.633216  | 0.457432  |
| 145 | 15137 | 0.389513 | 0.067492  | 0.001187  | 0.014828  |
| 146 | 15222 | 0.256618 | 1.65308   | 0.034278  | -0.0114   |
| 147 | 15309 | 0.545223 | 0.430199  | 0.163563  | 0.104754  |
| 148 | 15345 | 0.323272 | 0.577094  | 0.051085  | -0.005883 |
| 149 | 15373 | 0.820051 | -0.184471 | -0.149464 | -0.178873 |
| 150 | 15412 | 0.501649 | 0.856191  | 0.131453  | 0.138349  |
| 151 | 15444 | 0.749511 | -0.075551 | 0.23764   | 0.209821  |
| 152 | 15479 | 0.92818  | -0.235654 | 0.057329  | 0.012154  |
| 153 | 15593 | 0.533718 | 0.449937  | 0.037884  | -0.007577 |
| 154 | 15655 | 0.586275 | 0.451901  | 0.27869   | 0.230941  |
| 155 | 15762 | 0.340798 | 1.41418   | 0.320521  | 0.177813  |
| 156 | 15772 | 0.360176 | 0.679482  | 0.126706  | 0.205677  |
| 157 | 15866 | 0.867736 | 0.581362  | -0.060732 | -0.063955 |
| 158 | 15929 | 0.129967 | 1.08188   | 0.245715  | 0.165738  |
| 159 | 15936 | 0.622047 | 0.484544  | 0.043736  | 0.01355   |
| 160 | 15982 | 0.414152 | 1.47536   | 0.490927  | 0.44935   |
| 161 | 16159 | 0.30902  | 1.6662    | 0.410672  | 0.312519  |
| 162 | 16302 | 0.264442 | 0.801723  | -0.019168 | -0.025325 |
| 163 | 16371 | 1.17577  | -0.203101 | 0.084801  | 0.030396  |
| 164 | 16458 | 0.730185 | -0.158179 | 0.304494  | 0.260056  |
| 165 | 16525 | 1.00682  | -0.227806 | 0.183941  | 0.167211  |
| 166 | 16561 | 0.392132 | -0.299322 | 0.176144  | 0.141323  |
| 167 | 16570 | 0.880381 | -0.204586 | 0.188629  | 0.107652  |
| 168 | 16617 | 0.888559 | 0.665127  | 0.164815  | 0.082764  |
| 169 | 16621 | 0.706903 | 0.113918  | 0.215615  | 0.162146  |
| 170 | 16741 | 0.522639 | -0.435163 | 0.032681  | 0.014854  |
| 171 | 16744 | 0.365495 | 1.15256   | 0.097227  | 0.035249  |
| 172 | 16746 | 0.391161 | 1.83987   | 0.163718  | 0.109276  |
| 173 | 16784 | 0.427125 | 1.32374   | 0.286674  | 0.186003  |
| 174 | 16791 | 0.343092 | 1.2671    | 0.418874  | 0.25089   |
| 175 | 16816 | 0.150971 | 1.23682   | 0.399896  | 0.339542  |
| 176 | 16838 | 0.295382 | 0.607469  | -0.004561 | -0.006826 |
| 177 | 16865 | 0.405382 | 0.463807  | 0.127161  | 0.062659  |
| 178 | 16872 | 0.444597 | 0.583295  | 0.049456  | -0.015134 |

|     |       |          |           |          |           |
|-----|-------|----------|-----------|----------|-----------|
| 179 | 16891 | 0.912369 | -0.307451 | 0.035661 | 0.006041  |
| 180 | 16908 | 0.273452 | 0.702976  | 0.199783 | 0.090415  |
| 181 | 16953 | 0.338741 | 0.525323  | 0.019985 | 0.032917  |
| 182 | 16970 | 0.242866 | 1.15143   | 0.16791  | 0.102235  |
| 183 | 16985 | 0.393748 | 0.05452   | 0.118777 | 0.052456  |
| 184 | 16990 | 0.519429 | -0.266433 | 0.032945 | 0.067551  |
| 185 | 17086 | 0.498675 | 1.04766   | 0.148792 | 0.073944  |
| 186 | 17121 | 1.53258  | -0.558964 | 0.048236 | -0.014297 |
| 187 | 17220 | 0.529809 | 0.932846  | 0.101253 | 0.061035  |
| 188 | 17253 | 0.197377 | 1.67051   | 0.659982 | 0.449425  |
| 189 | 17262 | 0.440726 | 0.584825  | 0.134337 | 0.108242  |
| 190 | 17274 | 0.182507 | 0.818389  | 0.179163 | 0.212878  |
| 191 | 17298 | 0.428296 | 0.326679  | 0.19913  | 0.133123  |
| 192 | 17339 | 0.523876 | 0.639455  | 0.107648 | 0.075037  |
| 193 | 17383 | 0.859206 | -0.073878 | 0.220783 | 0.133985  |
| 194 | 17402 | 0.502903 | 0.454478  | 0.096762 | 0.054994  |
| 195 | 17410 | 0.811425 | -0.817421 | 0.197391 | 0.15882   |
| 196 | 17457 | 0.757468 | 0.79604   | 0.197108 | 0.093545  |
| 197 | 17524 | 0.883369 | -0.589163 | 0.00165  | 0.014651  |
| 198 | 17571 | 0.199479 | 0.85362   | 0.107216 | 0.076776  |
| 199 | 17599 | 0.224639 | 0.716749  | 0.189502 | 0.132636  |
| 200 | 17610 | 0.778613 | -0.271499 | 0.085983 | 0.068426  |
| 201 | 17656 | 0.356032 | 1.063     | 0.049217 | -0.038432 |
| 202 | 17748 | 0.184816 | 0.353625  | 0.523077 | 0.406545  |
| 203 | 17755 | 0.480547 | 0.206508  | 0.14689  | 0.065164  |
| 204 | 17793 | 0.457625 | 1.00061   | 0.120378 | 0.012937  |
| 205 | 17796 | 1.38165  | -0.206528 | 0.159467 | 0.109069  |
| 206 | 17816 | 0.454415 | 1.58477   | 0.618664 | 0.437136  |
| 207 | 17845 | 0.524221 | 0.434576  | 0.358179 | 0.233632  |
| 208 | 17893 | 0.400731 | 0.495348  | 0.108036 | 0.068846  |
| 209 | 18075 | 0.221896 | -0.030082 | 0.118264 | 0.107337  |
| 210 | 18121 | 0.405591 | 1.11851   | 0.11876  | 0.052445  |
| 211 | 18140 | 0.312474 | 0.649216  | 0.337492 | 0.227222  |
| 212 | 18173 | 1.35032  | 0.751873  | 0.25319  | 0.072994  |
| 213 | 18180 | 0.269045 | 0.627008  | 0.271358 | 0.279617  |
| 214 | 18202 | 0.727869 | 0.679106  | 0.178124 | 0.08724   |
| 215 | 18279 | 0.628178 | 0.740396  | 0.101588 | 0.027142  |
| 216 | 18316 | 0.99302  | 0.518087  | 0.118395 | 0.076093  |
| 217 | 18318 | 0.252683 | 1.05655   | 0.02487  | 0.052966  |
| 218 | 18326 | 0.482048 | 0.742846  | 0.134644 | 0.093029  |
| 219 | 18357 | 0.61396  | -0.036243 | 0.329267 | 0.189761  |
| 220 | 18365 | 1.45854  | -0.046895 | 0.436459 | 0.362248  |
| 221 | 18402 | 0.550976 | 0.200535  | 0.059816 | 0.028119  |
| 222 | 18410 | 0.413516 | 1.05377   | 0.167028 | 0.106624  |
| 223 | 18413 | 0.436999 | 0.180418  | 0.188158 | 0.168451  |

|     |       |          |           |          |           |
|-----|-------|----------|-----------|----------|-----------|
| 224 | 18468 | 1.13237  | -0.121403 | 0.007695 | 0.046588  |
| 225 | 18473 | 0.355709 | 0.770258  | 0.115926 | 0.029077  |
| 226 | 18503 | 0.315499 | 0.734626  | 0.207501 | 0.150804  |
| 227 | 18507 | 0.322743 | 0.922561  | 0.244102 | 0.149228  |
| 228 | 18511 | 0.251084 | 1.02717   | 0.219102 | 0.135112  |
| 229 | 18560 | 0.414737 | 0.864236  | 0.070396 | 0.018     |
| 230 | 18563 | 0.32485  | 0.59792   | 0.11383  | 0.064659  |
| 231 | 18571 | 0.308931 | 0.850331  | 0.121551 | 0.059589  |
| 232 | 18572 | 0.439646 | 0.868133  | 0.226431 | 0.182644  |
| 233 | 18578 | 0.726931 | 1.10658   | 0.089824 | 0.043156  |
| 234 | 18614 | 0.835628 | 0.346791  | 0.064575 | 0.025426  |
| 235 | 18637 | 0.284505 | 0.85059   | 0.200738 | 0.142915  |
| 236 | 18720 | 0.357466 | 1.55798   | 0.037426 | -0.054059 |
| 237 | 18737 | 0.507215 | -0.247627 | 0.297622 | 0.159342  |
| 238 | 18760 | 0.838404 | -0.082565 | 0.10164  | 0.083166  |
| 239 | 18811 | 0.439143 | 0.089608  | 0.019697 | 0.042663  |
| 240 | 18812 | 0.240144 | 0.214053  | 0.101414 | 0.093917  |
| 241 | 18826 | 0.721282 | -0.355456 | 0.040326 | 0.011069  |
| 242 | 18827 | 1.13571  | -0.567442 | 0.169556 | 0.046584  |
| 243 | 18846 | 1.16135  | -0.170013 | 0.116949 | 0.049087  |
| 244 | 18939 | 0.36552  | 0.998847  | 0.161113 | 0.081883  |
| 245 | 18978 | 0.833608 | -0.123962 | 0.090556 | 0.029199  |
| 246 | 19006 | 0.54217  | -0.232716 | 0.379686 | 0.26278   |
| 247 | 19094 | 0.649939 | 0.330755  | 0.087744 | 0.003931  |
| 248 | 19127 | 0.666653 | -0.132243 | 0.098921 | 0.04275   |
| 249 | 19234 | 1.06458  | 0.211891  | 0.12932  | 0.068072  |
| 250 | 19325 | 0.478075 | -0.113525 | 0.185449 | 0.128075  |
| 251 | 19345 | 0.789477 | -0.430826 | 0.065123 | 0.022501  |
| 252 | 19452 | 0.641975 | 0.128098  | 0.082877 | 0.032248  |
| 253 | 19462 | 1.02994  | -0.18816  | 0.261951 | 0.224938  |
| 254 | 19561 | 0.395328 | 0.716021  | 0.014059 | -0.065014 |
| 255 | 19640 | 0.765001 | 0.439033  | 0.074242 | -0.002596 |
| 256 | 19651 | 0.289715 | 1.19174   | 0.20469  | 0.142488  |
| 257 | 19687 | 0.914312 | 0.165106  | 0.088358 | 0.037315  |
| 258 | 19752 | 0.211589 | 0.753799  | 0.195487 | 0.112106  |
| 259 | 19765 | 0.467814 | 1.0829    | 0.250895 | 0.199877  |
| 260 | 19797 | 1.38323  | -0.138958 | 0.133744 | 0.017591  |
| 261 | 19825 | 0.382883 | 0.158884  | 0.291183 | 0.199654  |
| 262 | 19877 | 0.443049 | 0.91668   | 0.199153 | 0.118712  |
| 263 | 19884 | 0.356631 | 0.70954   | 0.371995 | 0.246502  |
| 264 | 19889 | 0.316442 | 0.251231  | 0.295465 | 0.240822  |
| 265 | 19940 | 0.422097 | 0.784596  | 0.160091 | 0.120547  |

|            | Reference # | n | mdf199 | 2 SD  | mdf200 | 2SD   |      |
|------------|-------------|---|--------|-------|--------|-------|------|
|            |             |   | ‰      | ‰     | ‰      | ‰     |      |
| UM-Almadén |             | 2 | 18     | -0.15 | 0.08   | -0.25 | 0.08 |
| IAEA-086   |             | 2 | 2      | 0.48  | 0.01   | 0.41  | 0.10 |
| TORT-2     |             | 2 | 3      | 0.80  | 0.05   | 0.13  | 0.07 |
| UM-Almadén | this study  |   | 209    | -0.16 | 0.08   | -0.26 | 0.08 |
| IAEA-086   | this study  |   | 35     | 0.47  | 0.08   | 0.39  | 0.07 |

| mdf201 | 2SD  | mdf202 | 2SD  | mdf204 | 2SD  | mif199 |
|--------|------|--------|------|--------|------|--------|
| ‰      | ‰    | ‰      | ‰    | ‰      | ‰    | ‰      |
| -0.40  | 0.11 | -0.51  | 0.07 | NA     | NA   | -0.02  |
| 0.82   | 0.11 | 0.77   | 0.10 | NA     | NA   | 0.29   |
| 0.74   | 0.13 | 0.18   | 0.11 | NA     | NA   | 0.75   |
| -0.44  | 0.10 | -0.54  | 0.08 | -0.81  | 0.12 | -0.02  |
| 0.77   | 0.10 | 0.72   | 0.08 | 1.04   | 0.14 | 0.29   |



| 2SD  | mif200 | 2SD  | mif201 | 2SD  | mif204 | 2SD  |
|------|--------|------|--------|------|--------|------|
| ‰    | ‰      | ‰    | ‰      | ‰    | ‰      | ‰    |
| 0.07 | 0.00   | 0.06 | -0.02  | 0.09 | NA     | NA   |
| 0.01 | 0.02   | 0.05 | 0.24   | 0.03 | NA     | NA   |
| 0.02 | 0.04   | 0.04 | 0.60   | 0.06 | NA     | NA   |
| 0.07 | 0.01   | 0.06 | -0.04  | 0.06 | 0.00   | 0.10 |
| 0.07 | 0.02   | 0.05 | 0.22   | 0.06 | -0.04  | 0.10 |
